# Supplementary material for: Bisphenol A Affects on the Functional Properties and Proteome of Testicular Germ Cells and Spermatogonial Stem Cells in vitro Culture Model
Source: PubMed Central journal article supplement (PMC5605497; doi:10.1038/s41598-017-12195-9), 2017-09-19
Supplement: 41598_2017_12195_MOESM1_ESM.pdf [file 41598_2017_12195_MOESM1_ESM.pdf]

1 **Supplementary Information for: Karmakar *et al.***

2

3

4 **Bisphenol A Affects on the Functional Properties and Proteome of Testicular Germ Cells and**  
5 **Spermatogonial Stem Cells *in vitro* Culture Model**

6 Polash Chandra Karmakar<sup>1,+</sup>, Hyun-Gu Kang<sup>1,+</sup>, Yong-Hee Kim<sup>1</sup>, Sang-Eun Jung<sup>1</sup>, Md Saidur Rahman<sup>1</sup>,  
7 Hee-Seok Lee<sup>2</sup>, Young-Hyun Kim<sup>3,4</sup>, Myung-Geol Pang<sup>1</sup> and Buom-Yong Ryu<sup>1,\*</sup>

8

9 <sup>1</sup>Department of Animal Science & Technology, Chung-Ang University, Anseong, Gyeonggi-do 456-756,  
10 Republic of Korea.

11 <sup>2</sup>Food Safety Risk Assessment Division, National Institute of Food & Drug Safety Evaluation, Ministry of  
12 Food and Drug Safety, 187 Osongsaengmyeong2-ro, Osong-eup, Heungdeok-gu, Cheongju-si,  
13 Chungcheongbuk-do, Republic of Korea.

14 <sup>3</sup>National Primate Research Center, Korea Research Institute of Bioscience and Biotechnology(KRIBB),  
15 30 Yeongudanji-ro, Ochang-eup, Cheongwon-gu, Cheongju-si, Chungcheongbuk-do, Republic of Korea.

16 <sup>4</sup>Department of Functional Genomics, KRIBB School of Bioscience, Korea University of Science and  
17 Technology(UST), 217 Gajeong-ro, Yuseong-gu, Daejeon, Republic of Korea.

18

19

20

21

22

23

24

25

## 26 **Supplementary Methods**

### 27 **Reagents**

28 Minimum essential medium  $\alpha$  (MEM $\alpha$ ; 12000-014, powder, Gibco, NY, USA) was used in the culture of  
29 testicular germ cells. SSC specified bovine serum albumin (BSA; A1470, Sigma, St. Louis, MO, USA)  
30 and growth factors such as glial cell line-derived neurotrophic factor (GDNF; 212-GD-50, R&D  
31 Systems, Minneapolis, MN, USA), GDNF family receptor  $\alpha 1$  (GFR $\alpha 1$ ; 560-GR-100, R&D Systems,  
32 Minneapolis, MN, USA), and basic fibroblast growth factor 2 (bFGF2; 354060, BD Biosciences, San  
33 Jose, CA, USA) were used in culture. Dulbecco's modified Eagle's medium (DMEM; 12100-046,  
34 powder, Gibco, NY, USA) was used for culturing SIM mouse embryo-derived thioguanine- and ouabain-  
35 resistant (STO) feeder cells. Plastic items used for culture and reagent preparation were proposed with  
36 lowest potential background of BPA.

37

### 38 **Magnetic activated cell sorting (MACS) and germ cell culture**

39 Testis cells, including spermatogonia, were collected from the testes of CD-1 and C57 GFP mouse pups  
40 (6-8 days old). Pups were euthanized by CO<sub>2</sub>, and testes were collected, decapsulated and washed with  
41 Dulbecco's phosphate buffered saline (DPBS; 14200166, Gibco, NY, USA). Seminiferous tubules were  
42 then incubated in a solution consisting 2:1 ratio of 0.25% trypsin-EDTA (25200056; Gibco, CA, USA)  
43 and 7 mg/mL DNase I (10104159001, Roche, Mannheim, Germany) dissolved in DPBS at 37°C for 5  
44 min. 10% (v/v) fetal bovine serum (FBS; SH30919.03, Thermo Scientific, Utah, USA) was then added to  
45 inactivate the enzymatic reactions and a cell suspension was prepared. To remove debris, the suspension  
46 was filtered through a 40- $\mu$ m pore size nylon mesh (BD Biosciences, San Jose, CA, USA). Cell viability  
47 was determined using the trypan blue exclusion test<sup>1</sup> (trypan blue solution; T8154, Sigma, St Louis, MO,  
48 USA), and testis cell preparations with a viability greater than 95% were used for subsequent steps. Cell  
49 suspension was then centrifuged at 600 x g for 7 min at 4°C and resuspended with suspension medium  
50 containing DMEM, 10% (v/v) FBS, 2 mM L-glutamine (25030, Gibco, SP, Brazil), 0.1 mM  $\beta$ -  
51 mercaptoethanol (M7522, Sigma, St Louis, MO, USA), and 100 U/mL penicillin with 100  $\mu$ g/mL

52 streptomycin (15140122, Gibco, NY, USA). 30% Percoll solution was prepared as 30% (v/v) Percoll  
53 (P1644, Sigma, St Louis, MO, USA), 1% (v/v) FBS, 0.5% (v/v) penicillin-streptomycin dissolved in  
54 deionized water (15230, Gibco, NY, USA). Cell suspension (2 mL, containing up to  $10 \times 10^6$  cells) was  
55 overlaid on 2 mL of 30% Percoll solution and centrifuged at  $600 \times g$  for 10 min at  $4^\circ\text{C}$  to separate  
56 erythrocytes and cell debris from the suspension. The pellet was resuspended with suspension medium.  
57 Mouse anti-THY-1 positive (Thy-1<sup>+</sup>) antibody with microbeads (Miltenyi Biotech, Auburn, CA, USA)  
58 was then used for separating undifferentiated germ cells by MACS as described previously<sup>2</sup>.  
59 After collection of germ cells from MACS, mouse serum free culture medium (mSFM, contains MEM $\alpha$ )  
60 was prepared and cell culture was prepared following the protocol described by Kubota *et al.*<sup>3,4</sup>. Briefly,  
61 cells were cultured with mSFM containing 10 ng/mL GDNF, 75 ng/mL GFR $\alpha$ 1, and 1 ng/mL bFGF2 to  
62 enhance the number of germ cells. Culture plates (24-well) were prepared with a layer of mitotically  
63 inactivated STO feeder cells before germ cell seeding. Germ cells collected from CD-1 and C57 GFP  
64 mice were placed on this feeder layer as approximately  $0.2 \times 10^6$  cells/well and incubated at  $37^\circ\text{C}$  in a 5%  
65 CO<sub>2</sub> atmosphere. Culture medium was changed in every 2-3 days. After 1 week, harvested cells were re-  
66 plated on new STO feeder layer. Two to three culture passages were continued in this way until the  
67 number of harvested cells was at least ~2-fold higher than the initial seeding number ( $0.2 \times 10^6$   
68 cells/well), at which point the germ cells were presumed to be stable enough for further experiments and  
69 decided to culture in the presence of BPA.

70

### 71 **Analysis of germ cell apoptosis**

72 BPA-exposed cultured germ cells were examined for apoptosis following similar procedure described  
73 previously<sup>5</sup>. Cells were exposed to Annexin V-Phycoerythrin (PE) apoptosis kit (559763, BD  
74 Biosciences, San Diego, CA, USA) and the kit manufacturer's protocol was followed with slight  
75 modification. Briefly, germ cells were washed (centrifuged at  $600 \times g$  for 7 min at  $4^\circ\text{C}$  and resuspended)  
76 twice with ice cold DPBS immediately after harvested from culture. After this wash, cells were  
77 resuspended with 1X binding buffer (kit provided) as  $2 \times 10^5$  cells/200  $\mu\text{L}$  and 10  $\mu\text{L}$  of Annexin V-PE

78 was added. Cells were incubated for 15 min in the dark at room temperature (RT) and the suspension  
79 volume was increased to 500  $\mu$ L with 1X binding buffer. After that, propidium iodide (PI; P4170, Sigma,  
80 St. Louis, MO, USA) buffer was added to a final concentration of 5  $\mu$ g/mL, and cells were placed on ice.  
81 Apoptotic cell populations were determined as a percentage of whole cell population using a FACS Aria  
82 flow cytometer (BD Biosciences CA, USA) with BD FACS Diva software. Germ cells collected from 6  
83 individual cultures were used for this analysis.

84

### 85 **Germ cell transplantation into recipient mice testes and analysis for donor cell derived colonies**

86 Germ cell transplantation into recipient mice testes is the only way to precisely quantify SSCs in a germ  
87 cell population. Therefore, BPA exposed cultured germ cells were transplanted into recipient C57BL/6  
88 mice. Six weeks old recipient mice were prepared for transplantation by injecting 45 mg/kg busulfan  
89 intraperitoneally (IP) to deplete endogenous spermatogenesis. On the day of transplantation, control and  
90 BPA-exposed cultured germ cells were harvested and prepared at a density of  $1.0 \times 10^6$  cells/mL with  
91 mSFM containing 10% (v/v) FBS and 10% DNase I (7 mg/mL). Before transplantation, recipient animals  
92 were anesthetized with 75 mg/kg ketamine and 0.5 mg/kg medetomidine. Lower abdominal hair was  
93 removed using a hair trimmer and the area was disinfected with iodine and 70% ethanol. A small surgical  
94 wound was then made and testis was driven out carefully from the abdomen. Next, donor germ cell  
95 suspension was labeled with 7% (v/v) trypan blue and was injected into the testes through efferent ducts  
96 as described previously<sup>6</sup>. About 8-10  $\mu$ L ( $\sim 1.0 \times 10^4$  cells) of donor cell suspension were injected into each  
97 testis, filling  $\sim 80\%$  of the surface seminiferous tubules.

98 Two and a half months after transplantation, the recipients were euthanized and the testes were collected  
99 and visualized under fluorescent microscope (Nikon AZ100, Tokyo, Japan). Testes were then  
100 decapsulated and the tubules were gently dispersed. The donor cell derived colonies were visualized  
101 separately and counted as previously described<sup>7</sup>; one colony ( $\geq 1$  mm in length) was considered to have  
102 been produced from one SSC.

103 **Two-dimensional gel electrophoresis (2-DE) analysis of BPA-induced proteome alterations in SSCs**  
104 **and pathway studio**

105 Cell extracts from 1 week BPA-treated cultured germ cells were used to scrutinize differential protein  
106 expression by two-dimensional gel electrophoresis. Control group and 0.01, 0.1, 1, 10, and 100  $\mu$ M BPA-  
107 treated groups were used. The fold difference in protein expression was expressed as the ratio of the  
108 intensity value of the spot derived from the BPA-treated group to the corresponding value for the control  
109 group. Three replications of cultured germ cells were used for this experiment.

110 Unless otherwise stated, all reagents were purchased from Sigma (St Louis, MO, USA). Protein extracts  
111 derived from cultured germ cells were incubated in a rehydration buffer containing 2 M thiourea, 7 M  
112 urea, 1% (w/v) octyl  $\beta$ -d-glucopyranoside, 24  $\mu$ M PMSF, 4% (w/v) 3-[(3-cholamidopropyl)  
113 dimethylammonio]-1-propanesulfonate (USB, Cleveland, OH, USA), 1% (w/v) DTT, 0.05% (v/v) Triton  
114 X-100, 0.002% (w/v) bromophenol blue and 0.5% (v/v) IPG buffer at 4°C for 1 h. Thereafter, cellular  
115 proteins (250  $\mu$ g) were solubilized and were placed in rehydration buffer (450  $\mu$ L) in a rehydration tray  
116 with 18 cm-long NL Immobiline DryStrips (pH 3–11; Amersham, Piscataway, NJ, USA) at 4°C for 12 h.  
117 An IPGphor isoelectric focusing apparatus (Amersham) was applied for first-dimension electrophoresis.  
118 Then, the strips were focused for 1 h to each of the volts as 100 V, 200 V, 500 V, 1000 V and 1.5 h to  
119 5000 V, 8000 V, and finally 1 h to 8000–90,000 V. The strips were then equilibrated with equilibration  
120 buffer A containing 6 M urea, 30% (v/v) glycerol, 75 mM Tris-HCl (pH 8.8), 2 % (w/v) SDS, 2 % (w/v)  
121 DTT and 0.002 % (w/v) bromophenol blue at RT for 15 min. Equilibration buffer B (equilibration buffer  
122 A with 2.5 % [w/v] iodoacetamide but without DTT) was used to equilibrate the strips for a second time  
123 at RT for 15 min. Second-dimension electrophoresis was carried out with 12.5 % (w/v) SDS-PAGE gels  
124 with the strips at 100 V for 1 h and 500 V until the bromophenol blue front began to migrate off the lower  
125 end of the gel. Following the manufacturer's instructions (Amersham), the gels were then silver-stained  
126 for image analysis and scanned using a high-resolution GS-800 calibrated scanner (Bio-Rad, Hercules,  
127 CA, USA). Detected protein spots were matched using PDQuest 8.0 software (Bio-Rad, Hercules, CA,  
128 USA) comparing the gels from BPA-treated germ cells and control. Finally, the densities of selected spots

129 were calculated and normalized as the ratio of the spot density in BPA-treated germ cells to the spot  
130 density in control.

131 In-gel protein identification by in-gel digestion, desalting and concentration technique was performed as  
132 described previously<sup>8,9</sup>. Mass spectrometry (MS) was used to generate peptide from in-gel digested  
133 proteins using tandem nano-electrospray ionization (ESI) on a MicroQ-TOF III mass spectrometer  
134 (Bruker Daltonics) at RT. The ESI-MS/MS data were analyzed using a peptide sequence system.  
135 MASCOT software (Matrix Science) was used to search for MS/MS ions. Peptide fragments attained  
136 from peptide peaks in ESI-MS by ESI-MS/MS were then identified using the Mascot search engine  
137 (Matrix Science). The results were limited to *Mus musculus*.

138 The Pathway Studio (version 9.0, Ariadne Genomics, MD, USA) classification system was used to  
139 predict the signaling pathways involved in the response to 0.01, 0.1, 1, 10, and 100  $\mu$ M BPA treatment  
140 and to understand the biological relevance of the observed changes in protein expression. The identified  
141 proteins were classified into several categories according to their functions during biological processes.  
142 Proteins involved in oxidative stress response, cell proliferation, and apoptosis, as well as heat shock  
143 proteins, accounted for the majority of the detected proteins. Protein–protein interactions among the  
144 identified proteins were also predicted based on the STRING system (version 10.0, online).

145

146

147

148

149

150

151

152

153

154

155 **Supplementary Figure Legend:**

156 **Figure S1. Representative silver nitrate stained image of 2-DE protein spots.** Protein spots of  
157 spermatogonial stem cells cultured with different concentrations of BPA are represented as (A) control,  
158 (B) 0.01  $\mu\text{M}$  BPA, (C) 0.1  $\mu\text{M}$  BPA, (D) 1  $\mu\text{M}$  BPA, (E) 10  $\mu\text{M}$  BPA, and (F) 100  $\mu\text{M}$  BPA.

159

160

161

162

163

164

165

166

167

168

169

170

171

172

173

174

175

176

177

178

179

180

181 **Supplementary Figure S1**

182

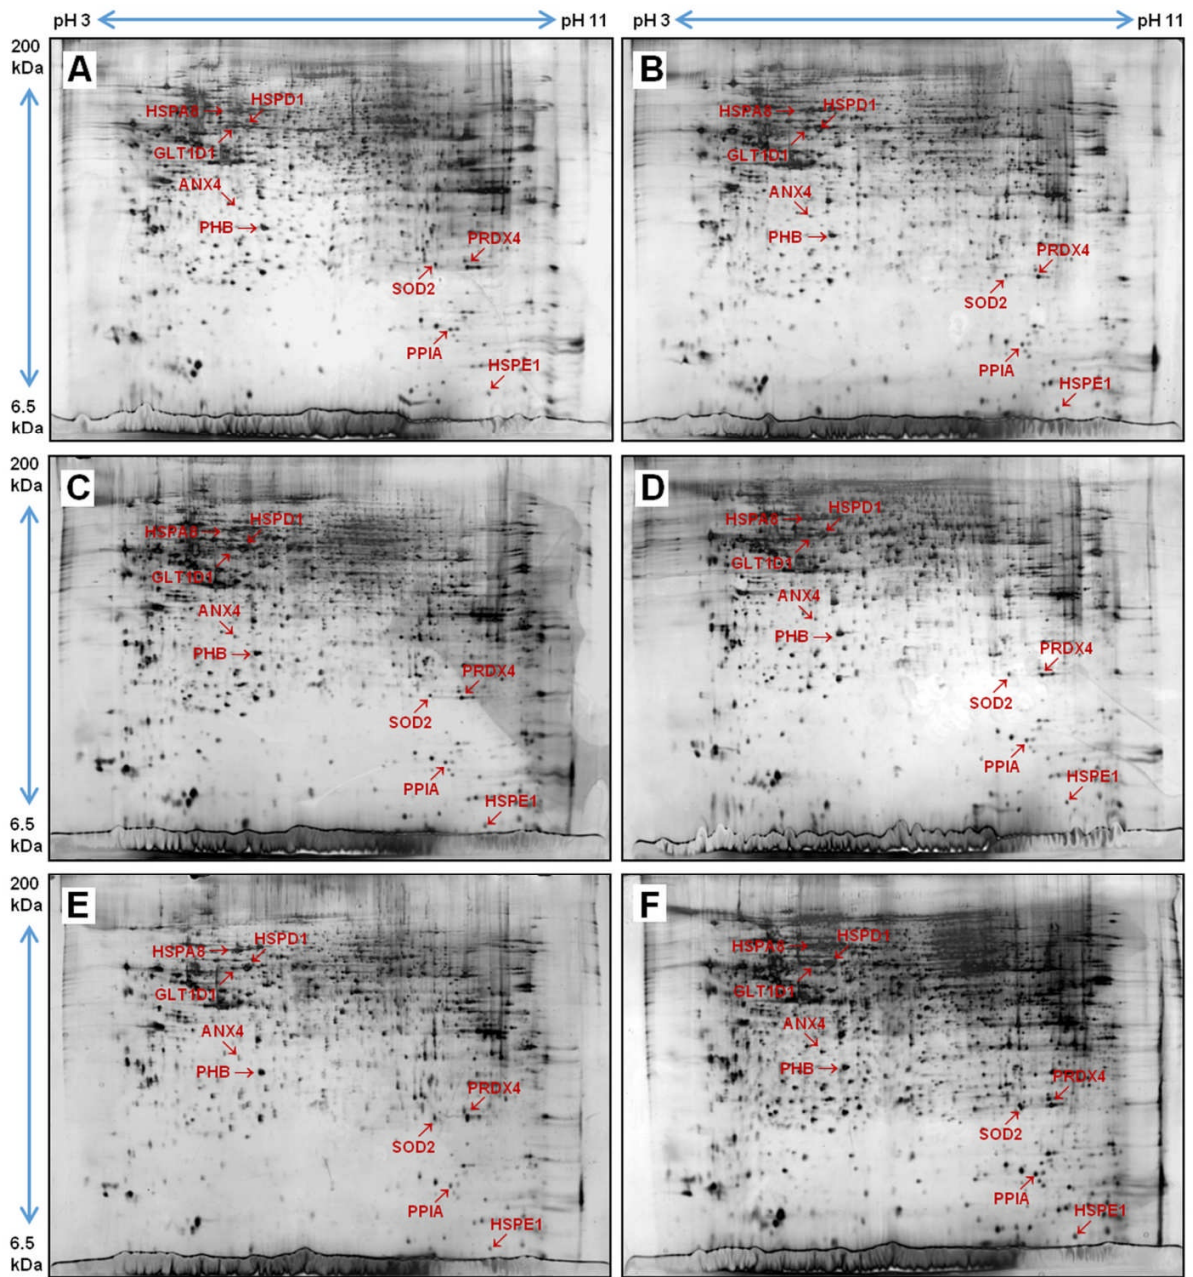

183

184

185

186

Supplementary Figure S1



187 **Supplementary References:**

188

- 189 1 Strober, W. Trypan blue exclusion test of cell viability. *Curr Protoc Immunol* **Appendix 3**,  
190 Appendix 3B, doi:10.1002/0471142735.ima03bs21 (2001).
- 191 2 Oatley, J. M. & Brinster, R. L. Spermatogonial stem cells. *Methods Enzymol* **419**, 259-282,  
192 doi:10.1016/S0076-6879(06)19011-4 (2006).
- 193 3 Kubota, H., Avarbock, M. R. & Brinster, R. L. Culture conditions and single growth factors affect  
194 fate determination of mouse spermatogonial stem cells. *Biol Reprod* **71**, 722-731,  
195 doi:10.1095/biolreprod.104.029207 (2004).
- 196 4 Kubota, H., Avarbock, M. R. & Brinster, R. L. Growth factors essential for self-renewal and  
197 expansion of mouse spermatogonial stem cells. *Proc Natl Acad Sci U S A* **101**, 16489-16494,  
198 doi:10.1073/pnas.0407063101 (2004).
- 199 5 Lee, Y. A. *et al.* Cryopreservation of mouse spermatogonial stem cells in dimethylsulfoxide and  
200 polyethylene glycol. *Biol Reprod* **89**, 109, doi:10.1095/biolreprod.113.111195 (2013).
- 201 6 Ogawa, T., Aréchaga, J.M., Avarbock, M.R. & Brinster, R.L. Transplantation of testis germinal  
202 cells into mouse seminiferous tubules. *Int J Dev Biol.* **41**(1), 111-22 (1997).
- 203 7 Nagano, M., Avarbock, M.R. & Brinster, R.L. Pattern and kinetics of mouse donor  
204 spermatogonial stem cell colonization in recipient testes. *Biol Reprod.* **60**(6), 1429-36 (1999).
- 205 8 Kwon, W. S. *et al.* A comprehensive proteomic approach to identifying capacitation related  
206 proteins in boar spermatozoa. *Bmc Genomics* **15**, 897, doi:10.1186/1471-2164-15-897 (2014).
- 207 9 Kwon, W. S. *et al* Discovery of Predictive Biomarkers for Litter Size in Boar Spermatozoa.  
208 *Molecular & Cellular Proteomics* **5**, 897, doi:10.1074/mcp.M114.045369 (2015).
- 209

210
